# Supplementary material
Source: PubMed Central journal article supplement (PMC3397828)
Supplement: NIHMS386446-supplement-01.pdf [file NIHMS386446-supplement-01.pdf]

## Figure S1

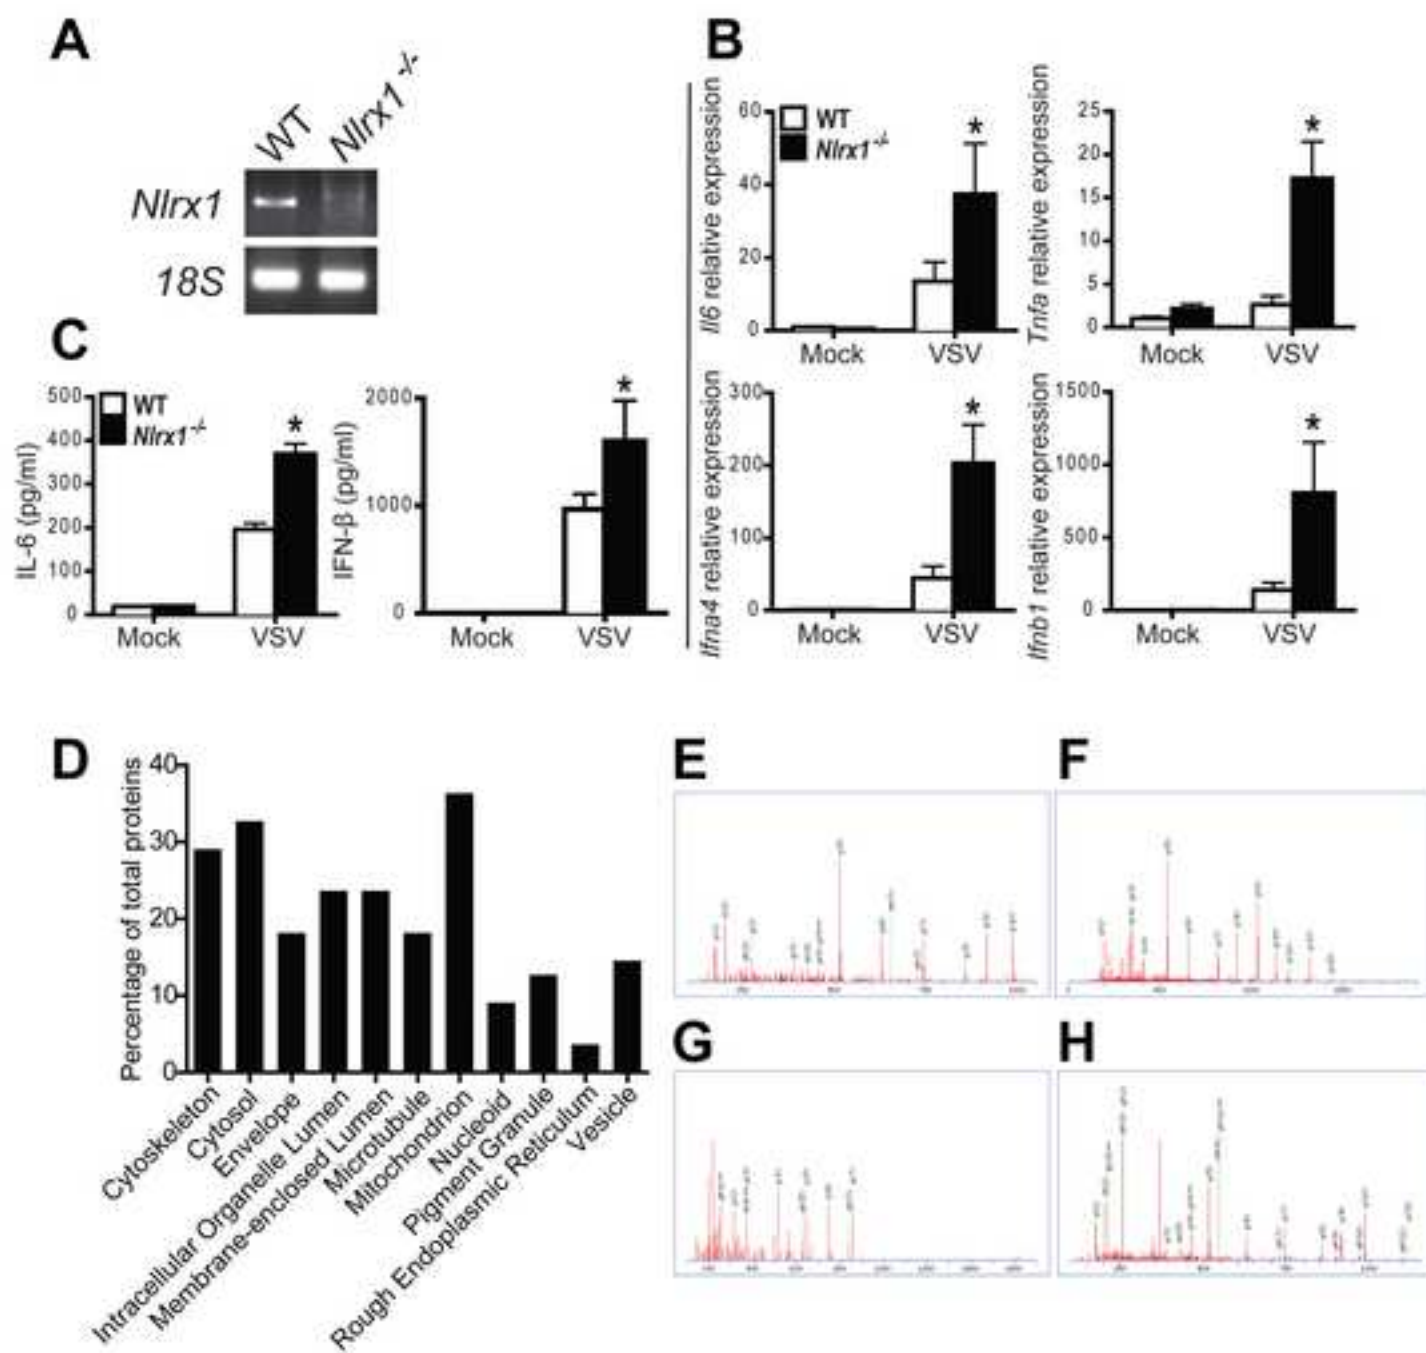

## Figure S2

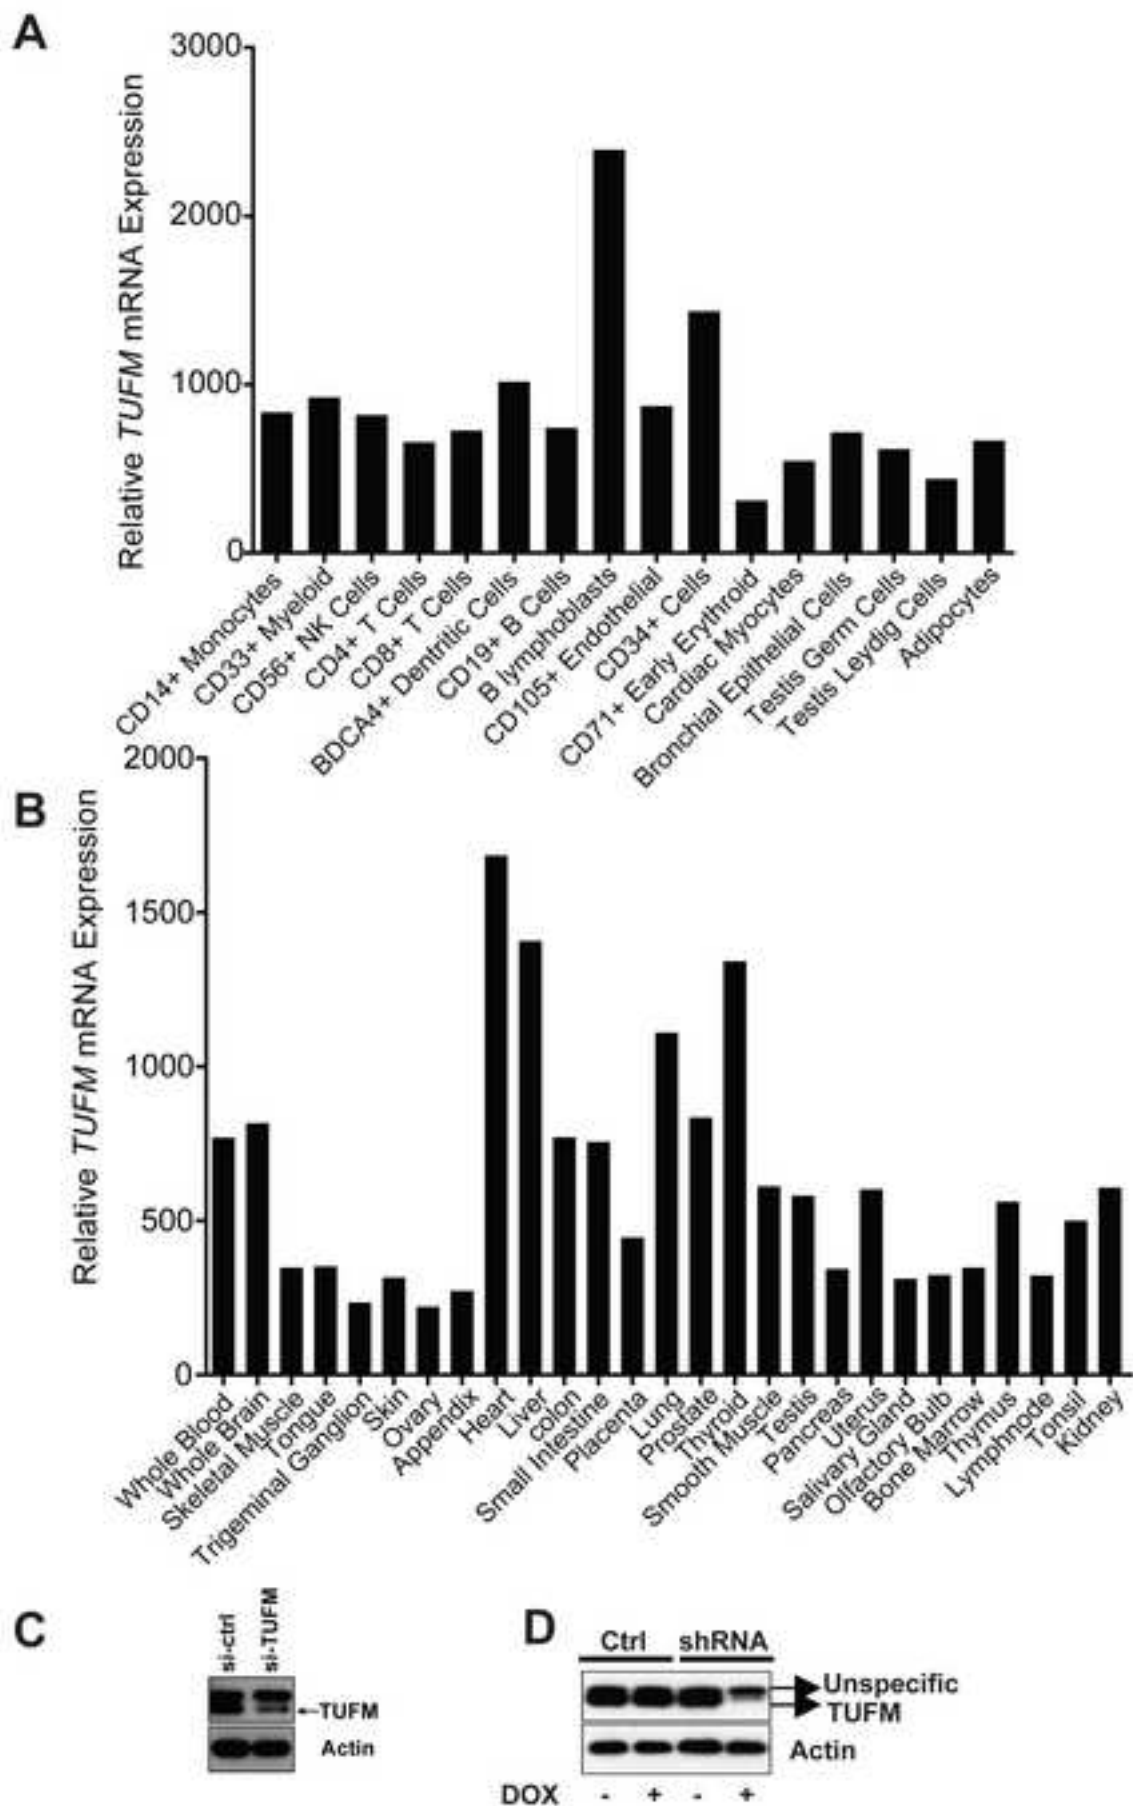

## Figure S3

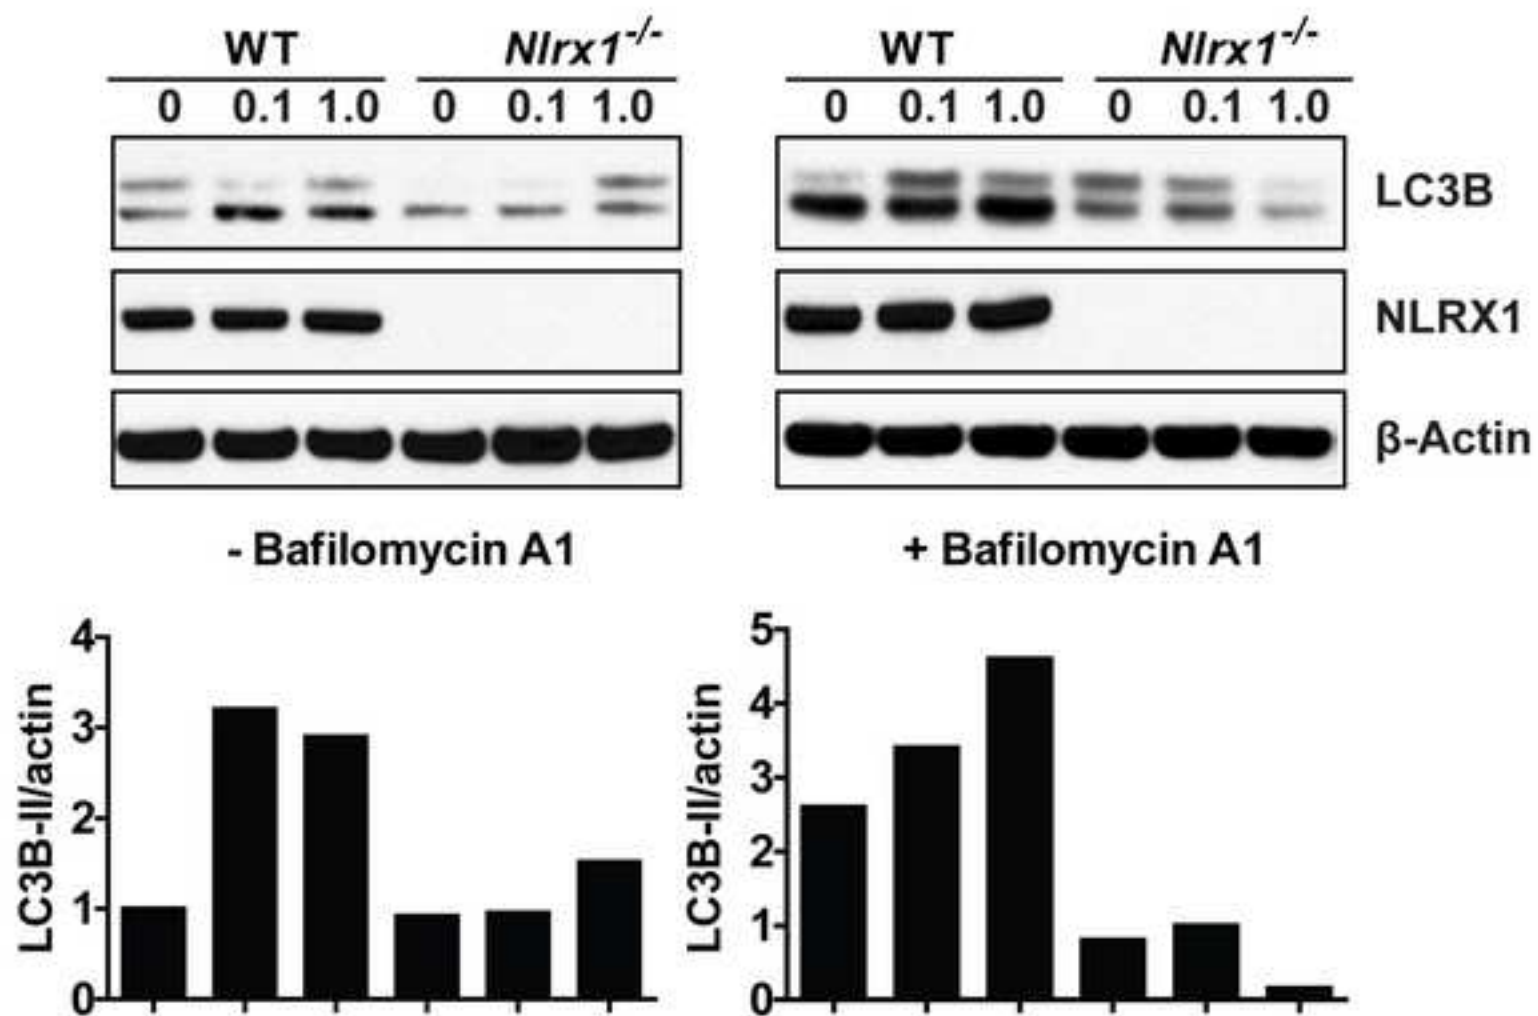

# Figure S4

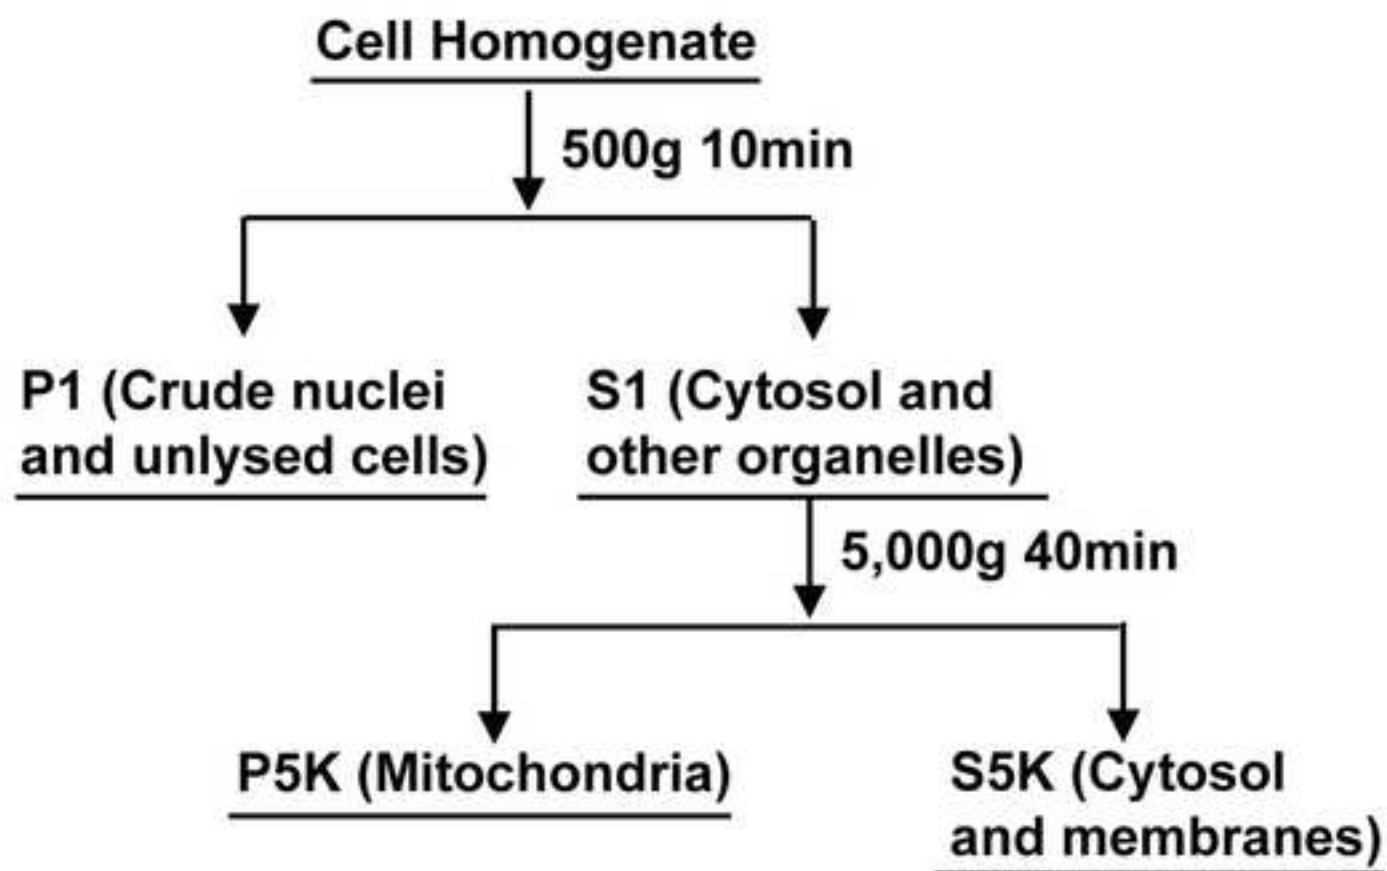

## Table S1

| <b>Bait</b>        | <b>Observed Mass</b> | <b>Sequence</b> | <b>Ion Score</b> |
|--------------------|----------------------|-----------------|------------------|
| NLRX1              | (A) 593.2867         | AEAGDNLGALVR    | 69               |
| NLRX1              | (B) 771.8945         | LLDAVDTYIPVPAR  | 107              |
| NLRX1 $\Delta$ LRR | (C) 550.3176         | ELLTEFGYK       | 39               |
| NLRX1 $\Delta$ LRR | (D) 593.3447         | AEAGDNLGALVR    | 42               |
